# Supplementary material for: Exploring the Onset and Progression of Prostate Cancer through a Multicellular Agent-based Model
Source: PubMed Central journal article supplement (PMC10405859; doi:10.1158/2767-9764.crc-23-0097), 2023-08-07
Supplement: crc-23-0097-s05.pdf [file crc-23-0097-s05.pdf]

**Supplementary Table 1. List of model assumptions**

| <b>Model assumption</b>                                                                                                                                                             | <b>Reference</b> |
|-------------------------------------------------------------------------------------------------------------------------------------------------------------------------------------|------------------|
| The shape and ratios of cells in the starting geometry; a prostatic acinus                                                                                                          | (1)              |
| The prostatic acinus is surrounded by ECM                                                                                                                                           | (2)              |
| ECM has variable permeability, depending on the stage of the disease                                                                                                                | (2)              |
| The presence and percentage of prostate cancer stem cells                                                                                                                           | (3,4)            |
| Tissue resident fibroblasts are quiescent and become active upon receiving a signal                                                                                                 | (5)              |
| Basement membrane is quiescent and functions as a barrier between the inside and outside of the acinus.                                                                             | (1,6)            |
| Quiescent cells remain in equilibrium/homeostasis; they do not migrate, proliferate or die                                                                                          | Trivial          |
| Basement membrane is broken down by proteolytic enzymes produced by tumor cells. Not all enzyme production results in actual break down (only 10-30 percent)                        | (6)              |
| Basement membrane break down does not happen right away, so tumor cells have to gain a certain amount of mutations before they can start break down                                 | (6)              |
| Basal cells and non-mutated luminal cells are in homeostasis; they can die and proliferate at low rates, within their normal/healthy regions                                        | Trivial          |
| Basal cells should always be attached to the basement membrane                                                                                                                      | (6)              |
| Basal cells can only die after enough luminal cells have mutated                                                                                                                    | (7)              |
| Non-quiescent cells can spontaneously enter apoptosis and die                                                                                                                       | (8), Experiments |
| Luminal cells can gain mutations                                                                                                                                                    | (1)              |
| Mutated luminal cells have a higher chance of gaining another mutation and are not quiescent or in equilibrium                                                                      | (1)              |
| Luminal stem cells can also gain mutations, generating 'cancer stem cells'                                                                                                          | (1)              |
| Mutated cells can proliferate                                                                                                                                                       | Experiments      |
| Upon gaining a mutation, oncogenic or tumor suppressing genes are affected. Mutated cells gain a proliferative advantage                                                            | (9)              |
| Apart from the 'standard' actions proliferate, migrate and die, mutated cells can perform additional actions (parallel to the other actions) once they have gained enough mutations | Trivial          |
| Additional actions of mutated cells include: affecting differentiation of macrophages, breaking down basement membrane and affecting ECM permeability                               | (2,6,10)         |

|                                                                                                                                           |                      |
|-------------------------------------------------------------------------------------------------------------------------------------------|----------------------|
| Mutated cells can only break down basement membrane if they are directly adjacent to it                                                   | Assumption           |
| Mutated cells move by a random walk and migrate towards fibroblasts                                                                       | Experiments, (11)    |
| Activation of tissue resident fibroblasts happens during PIN and is affected by mutated cells. CAFs co-evolve during disease progression. | (12–15)              |
| The effect of CAFs on tumor cells depends on the distance between the two                                                                 | (16)                 |
| CAFs can migrate towards mutated cells                                                                                                    | (8)                  |
| CAFs can proliferate and migrate more than normal fibroblasts                                                                             | (5)                  |
| CAFs stimulate primary tumor growth                                                                                                       | (17)                 |
| CAFs elicit Epithelial Mesenchymal Transition (EMT) in mutated cells                                                                      | (18)                 |
| CAFs modify the ECM; making it rather impermeable at the beginning and produce MMPs later on to degrade it                                | (2,13,19)            |
| Macrophages cannot proliferate (the few times they possibly could does not affect simulations)                                            | Experiments          |
| M1 macrophages enter the simulation from one point, mimicking entry via a blood vessel                                                    | (20)                 |
| Macrophages migrate towards mutated cells, but only if they are in reach (17 grid spaces). If they are further away, they move randomly   | (8,19)               |
| Macrophages infiltrate prostatic acini during PIN                                                                                         | (21,22)              |
| Macrophages can kill mutated cells. M1 polarized macrophages are more likely to kill than M2 polarized macrophages                        | Experiments, (23)    |
| If a macrophage kills a mutated cell, more macrophages are drawn to the acinus (increased influx)                                         | (21,22)              |
| M2 macrophages do not enter the simulation via the blood, but have to arise from differentiation of the M1 macrophages                    | (20)                 |
| M2 polarized macrophages promote mutated cell proliferation                                                                               | Experiments, (20,21) |
| Macrophages have to be adjacent to mutated cells to be able to promote those or kill those                                                | (21,24)              |
| M2 macrophages can elicit anchorage independent growth in tumor cells                                                                     | (21,25)              |

*Supplementary Table 1. Assumptions that were made during model development, including their source.*

### *References*

- Packer JR, Maitland NJ. The molecular and cellular origin of human prostate cancer. *Biochim Biophys Acta.* 2016;1863:1238–60.
- Winkler J, Abisoye-Ogunniyan A, Metcalf KJ, Werb Z. Concepts of extracellular matrix remodelling in tumour progression and metastasis. *Nat Commun.* 2020;11:5120.
- Collins AT, Berry PA, Hyde C, Stower MJ, Maitland NJ. Prospective identification of tumorigenic prostate cancer stem cells. *Cancer Res.* 2005;65:10946–51.

4. Zhang K, Guo Y, Wang X, Zhao H, Ji Z, Cheng C, et al. WNT/ $\beta$ -Catenin Directs Self-Renewal Symmetric Cell Division of hTERThigh Prostate Cancer Stem Cells [Internet]. *Cancer Research*. 2017. page 2534–47. Available from: <http://dx.doi.org/10.1158/0008-5472.can-16-1887>
5. Kalluri R. The biology and function of fibroblasts in cancer. *Nat Rev Cancer*. 2016;16:582–98.
6. Liu A, Wei L, Gardner WA, Deng C-X, Man Y-G. Correlated alterations in prostate basal cell layer and basement membrane. *Int J Biol Sci*. 2009;5:276–85.
7. Bostwick DG, Brawer MK. Prostatic intra-epithelial neoplasia and early invasion in prostate cancer. *Cancer*. 1987;59:788–94.
8. Kather JN, Poleszczuk J, Suarez-Carmona M, Krisam J, Charoentong P, Valous NA, et al. Modeling of Immunotherapy and Stroma-Targeting Therapies in Human Colorectal Cancer. *Cancer Res*. 2017;77:6442–52.
9. Barbieri CE, Baca SC, Lawrence MS, Demichelis F, Blattner M, Theurillat J-P, et al. Exome sequencing identifies recurrent SPOP, FOXA1 and MED12 mutations in prostate cancer. *Nat Genet*. 2012;44:685–9.
10. Cess CG, Finley SD. Multi-scale modeling of macrophage-T cell interactions within the tumor microenvironment. *PLoS Comput Biol*. 2020;16:e1008519.
11. Erdogan B, Ao M, White LM, Means AL, Brewer BM, Yang L, et al. Cancer-associated fibroblasts promote directional cancer cell migration by aligning fibronectin. *J Cell Biol*. 2017;216:3799–816.
12. Bonollo F, Thalmann GN, Kruithof-de Julio M, Karkampouna S. The Role of Cancer-Associated Fibroblasts in Prostate Cancer Tumorigenesis. *Cancers* [Internet]. 2020;12. Available from: <http://dx.doi.org/10.3390/cancers12071887>
13. Ojalill M, Virtanen N, Rappu P, Siljamäki E, Taimen P, Heino J. Interaction between prostate cancer cells and prostate fibroblasts promotes accumulation and proteolytic processing of basement membrane proteins. *Prostate*. 2020;80:715–26.
14. Farhood B, Najafi M, Mortezaee K. Cancer-associated fibroblasts: Secretions, interactions, and therapy. *J Cell Biochem*. 2019;120:2791–800.
15. Tuxhorn JA, Ayala GE, Smith MJ, Smith VC, Dang TD, Rowley DR. Reactive stroma in human prostate cancer: induction of myofibroblast phenotype and extracellular matrix remodeling. *Clin Cancer Res*. 2002;8:2912–23.
16. Ghajar CM, Correia AL, Bissell MJ. The Role of the Microenvironment in Tumor Initiation, Progression, and Metastasis [Internet]. *The Molecular Basis of Cancer*. 2015. page 239–56.e5. Available from: <http://dx.doi.org/10.1016/b978-1-4557-4066-6.00016-0>
17. Linxweiler J, Hajili T, Körbel C, Berchem C, Zeuschner P, Müller A, et al. Cancer-associated fibroblasts stimulate primary tumor growth and metastatic spread in an orthotopic prostate cancer xenograft model. *Sci Rep*. 2020;10:12575.
18. Giannoni E, Bianchini F, Masieri L, Serni S, Torre E, Calorini L, et al. Reciprocal Activation of Prostate Cancer Cells and Cancer-Associated Fibroblasts Stimulates Epithelial-Mesenchymal Transition and Cancer Stemness [Internet]. *Cancer Research*. 2010. page 6945–56. Available from: <http://dx.doi.org/10.1158/0008-5472.can-10-0785>
19. Norton K-A, Jin K, Popel AS. Modeling triple-negative breast cancer heterogeneity: Effects of stromal macrophages, fibroblasts and tumor vasculature. *J Theor Biol*. 2018;452:56–68.
20. Jenkins SJ, Ruckerl D, Cook PC, Jones LH, Finkelman FD, van Rooijen N, et al. Local macrophage proliferation, rather than recruitment from the blood, is a signature of TH2 inflammation. *Science*. 2011;332:1284–8.
21. Thomas MU, Messex JK, Dang T, Abdulkadir SA, Jorcyk CL, Liou G-Y. Macrophages expedite cell proliferation of prostate intraepithelial neoplasia through their downstream target ERK. *FEBS J*. 2021;288:1871–86.
22. Fang L-Y, Izumi K, Lai K-P, Liang L, Li L, Miyamoto H, et al. Infiltrating macrophages promote prostate tumorigenesis via modulating androgen receptor-mediated CCL4-STAT3 signaling. *Cancer Res*. 2013;73:5633–46.
23. Sica A, Larghi P, Mancino A, Rubino L, Porta C, Totaro MG, et al. Macrophage polarization in tumour progression. *Semin Cancer Biol*. 2008;18:349–55.
24. Skvortsov S, Skvortsova I-I, Tang DG, Dubrovskaya A. Concise Review: Prostate Cancer Stem Cells: Current Understanding. *Stem Cells*. 2018;36:1457–74.
25. Cioni B, Zaalberg A, van Beijnum JR, Melis MHM, van Burgsteden J, Muraro MJ, et al. Androgen receptor signalling in macrophages promotes TREM-1-mediated prostate cancer cell line migration and invasion. *Nat Commun*. 2020;11:4498.
