# Supplementary material for: Exploring the Onset and Progression of Prostate Cancer through a Multicellular Agent-based Model
Source: PubMed Central journal article supplement (PMC10405859; doi:10.1158/2767-9764.crc-23-0097), 2023-08-07
Supplement: crc-23-0097-s06.pdf [file crc-23-0097-s06.pdf]

**Supplementary Table 2.** List of model parameters

| <b>Model parameter</b> | <b>Description</b>                                                                            | <b>Value</b>             | <b>Reference</b> |
|------------------------|-----------------------------------------------------------------------------------------------|--------------------------|------------------|
| LCpprol                | Proliferation probability for luminal cells                                                   | 0.3054                   | Experiments, A   |
| TUpprol                | Proliferation probability for mutated luminal cells                                           | 0.3054                   | Experiments, A   |
| TUpmig                 | Migration probability for luminal cells that went through EMT                                 | 0.3501                   | Experiments, (1) |
| LCpdeath               | Probability of death for luminal cells                                                        | 0.00284                  | Experiments, A   |
| TUdeath                | Probability of death for mutated luminal cells                                                | 0.00284                  | Experiments, A   |
| TUwalk                 | Random walk effect on movement                                                                | 0.5                      | Experiments, (1) |
| TUpmax                 | Maximum amount of times luminal cells can proliferate (without mutations)                     | 4                        | Experiments, A   |
| TUps                   | Probability of symmetric division if proliferation for stem cells                             | 0.2967                   | B                |
| TUpmut                 | Probability of gaining a mutation for luminal cells                                           | 0.00015                  | (2), B           |
| TUantig                | Added antigenicity per mutation                                                               | 0.005                    | B                |
| TUmutmax               | Maximum amount of antigenicity luminal cells can obtain                                       | 1                        | B                |
| TUadded values         | Added probability for gaining a mutation (for cells that have one or more mutations already)  | $0.15 \cdot TU_{antig}$  | (2)              |
| TUadded values         | Added maximum proliferation capacity (each time an additional mutation is gained)             | 0.75                     | B                |
| TUadded values         | Added proliferation probability                                                               | $0.001 \cdot TU_{antig}$ | B                |
| TUpkill                | Probability of breaking down the basement membrane by mutated cells                           | 0.3                      | (3), B           |
| TUthrshBM              | Needed amount of mutations before basement membrane can be broken down                        | 6                        | Arbitrary, C     |
| TUpmdiff               | Probability of affecting macrophage differentiation by mutated luminal cells                  | 0.8                      | (4,5)            |
| TUthrshM               | Needed amount of mutations before macrophage differentiation can be affected by mutated cells | 14                       | Arbitrary, C     |
| TUpMMP                 | Probability of breaking down surrounding ECM                                                  | 0                        | Variable, D      |

|                       |                                                                                       |        |                |
|-----------------------|---------------------------------------------------------------------------------------|--------|----------------|
| TUthrshMMP            | Needed amount of mutations before mutated cells can affect ECM break down             | 15     | Arbitrary, C   |
| M1kmax                | Maximum killing capacity of M1 macrophages                                            | 11     | Experiments, A |
| M1pkill               | Probability of killing by M1 macrophages                                              | 0.0918 | Experiments, A |
| M1pmig                | Migration probability of M1 macrophages                                               | 0.8001 | (2)            |
| M1pdeath              | Probability of death for M1 macrophages                                               | 0.0147 | Experiments, A |
| M1rwalk               | Random walk effect on movement of M1 macrophages (if further away than 17 gridspaces) | 0.8    | (6), B         |
| M1speed               | Speed of movement                                                                     | 40     | (2), B         |
| M1engagement Duration | Number of steps the M1 cell is engaged                                                | 60     | (2), B         |
| M1influxRate          | Amount of macrophages that enter the simulation each time                             | 1      | (1)            |
| M1influxProb          | Probability of M1 macrophages entering the simulation                                 | 0.08   | B              |
| M1influxadd           | Factor with which the influx increases after killing the first mutated cell           | 3      | B              |
| M2kmax                | Maximum killing capacity of M2 macrophages                                            | 11     | Experiments, A |
| M2pkill               | Probability of killing by M2 macrophages                                              | 0.0381 | Experiments, A |
| M2pmig                | Migration probability of M2 macrophages                                               | 0.8001 | (2)            |
| M2pdeath              | Probability of death for M2 macrophages                                               | 0.0147 | Experiments, A |
| M2rwalk               | Random walk effect on movement of M2 macrophages (if further away than 17 gridspaces) | 0.8    | (6), B         |
| M2speed               | Speed of movement                                                                     | 40     | (2), B         |
| M2influxProb          | Probability of M2 macrophages entering the simulation                                 | 0      | (5)            |
| M2TUadd               | Added probability for proliferation of luminal cells                                  | 0.2985 | Experiments, A |
| M2engagement duration | Number of steps the M2 cell is engaged                                                | 60     | (2), B         |
| M2emt                 | Probability of the M2 macrophage eliciting EMT in a mutated luminal cell if in range  | 0.75   | (7), B         |
| Fpprol                | Proliferation probability of fibroblasts                                              | 0      | (11), E        |
| Fpmig                 | Migration probability of fibroblasts                                                  | 0      | (11), E        |
| Fpdeath               | Probability of death of fibroblasts                                                   | 0      | (11), E        |

|          |                                                                                     |                 |                   |
|----------|-------------------------------------------------------------------------------------|-----------------|-------------------|
| Fpmax    | Maximum proliferation capacity                                                      | 0               | (11), E           |
| Frwalk   | Random walk effect on movement of fibroblasts                                       | 0               | (11), E           |
| Fdiff    | Probability of fibroblasts turning into CAFs when in range of mutated luminal cells | 0.75            | (8)               |
| CFpprol  | Proliferation probability of activated fibroblasts (CAFs)                           | 0.00838         | Experiments, B    |
| CFpmig   | Migration probability of CAFs                                                       | 0.2             | B                 |
| CFpdeath | Probability of death of CAFs                                                        | 0.0054          | (11), Experiments |
| CFpmax   | Maximum proliferation capacity                                                      | 4               | Experiments, A    |
| CFrwalk  | Random walk effect on movement of CAFs                                              | 0.5             | Experiments, B    |
| CFemt    | Probability of the CAF eliciting EMT in a mutated luminal cell if in range          | 0.75            | (9),B             |
| CFprom   | Added probability for proliferation of mutated luminal cells                        | 0.5*<br>TUpprol | (10)              |
| CFmmp    | Probability of surrounding ECM break down by CAFs                                   | 0.9             | B                 |
| CFmdiff  | Probability of CAFs affecting macrophage differentiation                            | 0.5             | Variable, D       |
| Cpprol   | Proliferation probability of basal cells                                            | 0.2             | (12), F           |
| Cpmig    | Migration probability of basal cells                                                | 0               | (12), F           |
| Cpdeath  | Probability of death of basal cells                                                 | 0.01            | (12), F           |
| Cpmax    | Maximum proliferation capacity                                                      | 10              | B                 |
| Bpdeath  | Probability of death of basement membrane                                           | 0               | Trivial           |
| Bpprol   | Probability of proliferation for basement membrane                                  | 0               | Trivial           |

*Supplementary Table 2. Model parameter values* **A** -These parameters were determined by fitting them to the obtained experimental data, using the PSO algorithm described in the Materials and Methods section. **B** -These parameters can be freely chosen by the user. They were qualitatively tuned for these simulations to yield realistic results. **C** -These parameters (thresholds) can be freely chosen by the user. Increasing these parameters increases the amount of time it takes before disease can progress towards the next stage. **D** -These parameters were set to zero for the performed simulations, but can be set to higher values if the user wishes to include these processes/effects. **E** -These fibroblast parameters were all set to zero, as the tissue resident fibroblasts are believed to be quiescent before they are activated as CAFs in this case (11). **F** -Disruption of the basal cell layer takes place exponentially; only 0.7 percent breakdown in the first stage of PIN, 15 percent in the second stage and 52 percent in the third stage. These parameters were qualitatively tuned to get values close to these. **G** -Distances from which mutated cells affect macrophage differentiation and elicit ECM break down, the distances from which CAFs can break down ECM or elicit EMT and the distance from which macrophages can elicit

*anchorage independent growth were found to be insensitive in the sensitivity analysis. The chosen values are trivial (if bigger than 1).*

## References

1. Kather JN, Poleszczuk J, Suarez-Carmona M, Krisam J, Charoentong P, Valous NA, et al. Modeling of Immunotherapy and Stroma-Targeting Therapies in Human Colorectal Cancer. *Cancer Res.* 2017;77:6442–52.
2. Kather JN, Charoentong P, Suarez-Carmona M, Herpel E, Klupp F, Ulrich A, et al. High-Throughput Screening of Combinatorial Immunotherapies with Patient-Specific Models of Metastatic Colorectal Cancer. *Cancer Res.* 2018;78:5155–63.
3. Liu A, Wei L, Gardner WA, Deng C-X, Man Y-G. Correlated alterations in prostate basal cell layer and basement membrane. *Int J Biol Sci.* 2009;5:276–85.
4. Cess CG, Finley SD. Multi-scale modeling of macrophage-T cell interactions within the tumor microenvironment. *PLoS Comput Biol.* 2020;16:e1008519.
5. Wells DK, Chuang Y, Knapp LM, Brockmann D, Kath WL, Leonard JN. Spatial and functional heterogeneities shape collective behavior of tumor-immune networks. *PLoS Comput Biol.* 2015;11:e1004181.
6. Thomas MU, Messex JK, Dang T, Abdulkadir SA, Jorczyk CL, Liou G-Y. Macrophages expedite cell proliferation of prostate intraepithelial neoplasia through their downstream target ERK. *FEBS J.* 2021;288:1871–86.
7. Cioni B, Zaalberg A, van Beijnum JR, Melis MHM, van Burgsteden J, Muraro MJ, et al. Androgen receptor signalling in macrophages promotes TREM-1-mediated prostate cancer cell line migration and invasion. *Nat Commun.* 2020;11:4498.
8. Anderberg C, Pietras K. On the origin of cancer-associated fibroblasts. *Cell Cycle.* 2009;8:1461–2.
9. Giannoni E, Bianchini F, Masieri L, Serni S, Torre E, Calorini L, et al. Reciprocal Activation of Prostate Cancer Cells and Cancer-Associated Fibroblasts Stimulates Epithelial-Mesenchymal Transition and Cancer Stemness [Internet]. *Cancer Research.* 2010. page 6945–56. Available from: <http://dx.doi.org/10.1158/0008-5472.can-10-0785>
10. Linxweiler J, Hajili T, Körbel C, Berchem C, Zeuschner P, Müller A, et al. Cancer-associated fibroblasts stimulate primary tumor growth and metastatic spread in an orthotopic prostate cancer xenograft model. *Sci Rep.* 2020;10:12575.
11. Kalluri R. The biology and function of fibroblasts in cancer. *Nat Rev Cancer.* 2016;16:582–98.
12. Bostwick DG, Brawer MK. Prostatic intra-epithelial neoplasia and early invasion in prostate cancer. *Cancer.* 1987;59:788–94.
