# Supplementary material for: Exploring the Onset and Progression of Prostate Cancer through a Multicellular Agent-based Model
Source: PubMed Central journal article supplement (PMC10405859; doi:10.1158/2767-9764.crc-23-0097), 2023-08-07
Supplement: crc-23-0097-s07.pdf [file crc-23-0097-s07.pdf]

**Supplementary Table 3.** *Parameter values of eight patient groups*

| <b>Parameter</b>   | <b>Low/anti tumor value</b> | <b>High/pro tumor value</b> |
|--------------------|-----------------------------|-----------------------------|
| TUpmut             | 0.0000075                   | 0.000175                    |
| CFprom             | 0.01                        | 0.7                         |
| M1pmig<br>TUthrshM | 0.01<br>20                  | 0.51<br>1                   |

*Supplementary Table 3. Model parameter values to distinguish between patients of the eight different categories.*
