# Supplementary material for: Exploring the Onset and Progression of Prostate Cancer through a Multicellular Agent-based Model
Source: PubMed Central journal article supplement (PMC10405859; doi:10.1158/2767-9764.crc-23-0097), 2023-08-07
Supplement: crc-23-0097-s08.pdf [file crc-23-0097-s08.pdf]

**Supplementary Table 4.** Percentages of cancer in model simulations

| <b>Simulated patient phenotype</b>              | <b>Percentage of cancer development</b> |
|-------------------------------------------------|-----------------------------------------|
| High Cfprom, pro-tumor macrophages & high Pmut  | 89 %                                    |
| High Cfprom, anti-tumor macrophages & high Pmut | 96%                                     |
| Low Cfprom, anti-tumor macrophages & high Pmut  | 96%                                     |
| Low Cfprom, pro-tumor macrophages & high Pmut   | 89%                                     |
| High Cfprom, pro-tumor macrophages & low Pmut   | 7.5%                                    |
| Low Cfprom, pro-tumor macrophages & low Pmut    | 7.9%                                    |
| High Cfprom, anti-tumor macrophages & low Pmut  | 27%                                     |
| Low Cfprom, anti-tumor macrophages & low Pmut   | 23%                                     |

*Supplementary Table 4. Percentages of the simulations that resulted in cancer (i.e. break down of the basement membrane) for the eight simulated phenotypes.*
